# Supplementary material for: Polycyclic aromatic hydrocarbons in silicone wristbands of Uruguayan children: measurement and exposure source exploration
Source: Royal Society of Chemistry journal article supplement (doi:10.1039/d3va00364g), 2024-01-01
Supplement: d3va00364g1.xlsx [file d3va00364g1.xlsx]

## Sheet: Table of Contents
Sheet Name	Description
Table S1 GC-MS Figure of Merit	PAH names, masses, observed m/z and fragmetns, LODs, and R2 values
Table S2 PCA Analysis	Eigenvalue, Eigenvector, Score, and treated data for PCA
Figure S1 Structures of PAHs	Strucutures of the 27 PAHs used in this study
Fiure S2 Scree Plot	Distribution of Eigenvalues for PCA analysis
Table S3 PAH Detections in WB	Detected PAHs in wristband for all 24 study participants
Table S4 Urinary met. detection	Detected PAHs in urine samples for all 24 study participants
Table S5 WB PAH RHO	Correlation Coeffiecents for PAHS detected in wristbands
Table S6 Urinary Met RHO	Correlation Coeffiecents for PAHS and OH-PAHs in urine and wrsitbands

## Sheet: Table S1 GC-MS Figure of Merit
Table S1: Figure of merit for PAH detections parameters in our GC-MS/MS method. A 5 eV fragmentation voltage was used to reduce background noise. The molecular ion, product ion, and precursor ion are all the same in this analysis. Recoveries of the reported ethyl acetate/C18 solid phase extraction method for each compound is reported here. Limits of detection/quantitation as well as R­2 values ar…
PAH	RT (min)	Mass	M/Z Precursor (Product)	% Recoveries (± Std)	LOD (ppb)	LOQ (ppb)	R2
Naphthalene	6.6	128	128 (128)	61.9 ± 4.6	0.08	0.27	0.928
1-Methyl Naphthalene	7.66	142	142 (142)	77.3 ± 18.4	0.05	0.18	0.942
2-Methyl Naphthalene	7.84	142	142 (142)	79.1 ± 18.6	0.04	0.12	0.96
1,2 Dimethyl Naphthalene	9.05	156	156 (156)	88.7 ± 23.0	1.14	3.8	0.971
Acenaphthylene	9.45	152	152 (152)	85.2 ± 23.4	0.25	0.82	0.992
1,6 Dimethyl Naphthalene	9.49	156	156 (156)	85.0 ± 18.0	0.15	0.52	0.991
Acenaphthene	9.94	154	154 (154)	86.3 ± 24.7	0.44	1.45	0.993
1,6,7 Trimethyl Naphthalene	11.18	170	170 (170)	92.4 ± 19.6	0.37	1.24	0.991
Fluorene	11.57	166	166 (166)	91.5 ± 28.9	0.43	1.44	0.992
Dibenzothiophene	15.31	184	184 (184)	85.5 ± 25.7	0.08	0.27	0.996
Anthracene	16.01	178	178 (178)	89.7 ± 26.0	0.15	0.49	0.995
Phenanthrene	16.27	178	178 (178)	95.1 ± 31.3	0.06	0.21	0.995
1-Phenyl Naphthalene	18.19	204	204 (204)	86.7 ± 19.1	0.04	0.14	0.994
2-Methyl Anthracene	19.39	192	192 (192)	77.0 ± 13.1	0.19	0.62	0.995
1-Methylphenanthrene	19.66	192	192 (192)	90.1 ± 19.3	0.19	0.64	0.996
2-Methylphenanthrene	20.14	192	192 (192)	81.4 ± 20.3	0.49	1.63	0.994
2-Phenyl Naphthalene	21.61	204	204 (204)	90.5 ± 18.3	0.12	0.41	0.996
3,6-Dimethylphenanthrene	22.74	206	206 (206)	63.8 ± 29.5	0.11	0.37	0.995
Pyrene	24	202	202 (202)	89.9 ± 21.7	2.06	6.86	0.977
Fluoranthene	24.64	202	202 (202)	83.6 ± 17.8	3.91	13.04	0.985
1-Methylpyrene	25.75	216	216 (216)	80.4 ± 17.0	0.04	0.15	0.994
Benz(a)anthracene	26.4	228	228 (228)	69.5 ± 17.0	0.06	0.19	0.995
Benzo(c)phenanthrene	26.68	228	228 (228)	80.7 ± 23.8	0.06	0.18	0.996
Chrysene/Triphenylene	26.74	228	228 (228)	68.1 ± 16.7	0.04	0.15	0.997
Benz(a)pyrene	28.99	252	252 (252)	48.3 ± 27.7	0.18	0.6	0.994
Benz(e)pyrene	29.08	252	252 (252)	60.4 ± 31.7	0.06	0.2	0.995
D-8 Naphthalene	6.6	136	136 (136)
D-10 Acenaphthene	9.9	164	164 (164)
D-10 Fluorene	11.47	176	176 (176)
D-10 Anthracene	15.89	188	188 (188)
D-10 Phenanthrene	16.17	188	188 (188)
D-10 Pyrene	23.93	212	212 (212)
D-10 Fluoranthene	24.6	212	212 (212)
D-12 Benzo(c)phenanthrene	26.6	240	240 (240)
D-12 Chrysene	26.7	240	240 (240)
RT: Retention time
LOD: limit of detection
LOQ: limit of quantitation
ppb: part per billion (µg/L)

## Sheet: Table S2 PCA Analysis
Table S2A	Pretreated PAH detections
Auto Scaling	Number of Parents who smoke	Naphthalene	1-Methyl Naphthalene	2-Methyl Naphthalene	Acenaphthylene	1,6 Dimethyl Naphthalene	Fluorene	1,6,7 Trimethylnaphthalene	Anthracene	Dibenzothiopene	2-Methyl Anthracene	1-Methylphenanthrene	2-Methylphenanthrene	Pyrene	Fluoranthene	1-Phenyl Naphthalene	2-Phenyl Naphthalene	1 Methylpyrene	Benzo(c)phenanthrene
P1	0	-0.557693	0.167846	0.248765	-0.593156	-0.647411	-0.731537	0.616287	-0.211283	-0.311864	-0.339754	0.0356564	-0.33911	-0.562457	-0.603394	0.167624	-0.390151	-0.390965	0.764757
P5	0	0.523341	0.09695	-0.629139	-0.529209	-0.506456	0.390052	-0.635673	0.182414	-0.794242	-0.353654	-0.42074	4.28765	-0.244876	-0.800124	-0.786447	-0.233007	-0.510878	-0.72342
P7	0	0.0794309	0.10421	0.985918	0.55694	1.84368	0.364447	1.05295	-0.228529	0.97913	-0.205163	-0.0525058	-0.0603711	0.571004	-0.00407254	1.29714	0.0450943	-0.313549	2.1646
P10	0	0.0248417	-0.164113	0.0602901	-0.0672464	0.227167	0.323133	0.982057	0.191586	1.02705	-0.0738103	0.175228	0.336604	0.0285988	0.005629	0.979022	-0.366771	-0.152931	1.36338
P13	0	0.0680906	0.116628	0.573853	0.702177	-0.132883	0.599328	0.507172	0.322612	0.923374	0.0821163	-0.0795886	-0.0994564	1.82064	1.06323	1.86737	0.380576	-0.297694	0.656269
P21	0	0.281567	0.201901	1.01325	1.95301	1.35431	0.769953	0.968577	0.144156	0.603102	-0.206143	-0.362149	-0.222841	1.23755	1.18193	2.60627	0.564464	-0.00431615	2.62684
P24	0	-0.394949	-0.243635	-0.629139	-0.529209	-0.506456	0.551708	-0.635673	-0.136768	0.307017	-0.353654	-0.349976	-0.0518249	0.208679	0.0592538	-0.786447	0.208705	-0.255032	-0.72342
P3	1	-0.572707	-0.496507	0.0685137	0.0333398	0.710617	1.70446	0.524869	-0.408615	-0.0291583	4.23194	-0.415115	-0.10501	-0.719364	-0.558947	0.220646	-0.291776	-0.400318	0.570002
P6	1	-0.680792	-0.852549	-0.450884	0.283834	1.11446	-1.15012	-0.635673	-0.542412	-0.794242	-0.353654	-0.42074	-0.451078	-0.943364	-0.800124	-0.786447	-0.661908	-0.510878	-0.72342
P11	1	-0.714222	1.16174	-0.629139	-0.529209	-0.506456	2.00437	-0.635673	4.34683	2.8966	-0.353654	2.47469	1.09137	2.08155	1.6558	-0.786447	2.19808	-0.23457	-0.72342
P12	1	-0.754622	-0.622266	-0.629139	-0.529209	-0.506456	1.48186	-0.635673	-0.219911	-0.468957	-0.353654	-0.42074	-0.096829	0.601688	0.750977	-0.786447	0.199795	0.210044	-0.72342
P14	1	-0.754622	-0.976589	-0.629139	-0.529209	-0.506456	-0.426442	-0.635673	-0.221484	-0.794242	-0.353654	-0.42074	-0.451078	-0.668602	-0.495238	-0.786447	-0.43772	-0.510878	-0.72342
P15	1	3.2128	3.03015	-0.629139	-0.529209	-0.506456	1.35606	-0.635673	-0.542412	-0.794242	-0.353654	-0.42074	-0.451078	1.62163	2.049	-0.786447	-0.389303	3.50257	-0.72342
P17	1	-0.340321	-0.77194	-0.230975	-0.529209	-0.506456	-1.15012	-0.635673	-0.542412	-0.794242	-0.353654	-0.42074	-0.451078	-0.943364	-0.800124	-0.786447	-0.661908	-0.510878	-0.72342
P18	1	-0.754622	-0.767835	-0.629139	-0.360994	-0.708034	-0.483109	0.057926	-0.110532	0.138253	1.48356	-0.129722	-0.152166	-0.739714	-0.244671	0.534867	-0.0899524	-0.340304	0.333397
P20	1	-0.184297	0.284045	0.511979	-0.159134	-0.773223	-0.359945	0.030157	-0.160878	-0.430223	-0.346727	-0.325268	-0.426704	-0.234298	-0.558517	-0.0613274	-0.431092	-0.30916	0.722678
P23	1	-0.268005	-0.28882	0.220278	-0.29523	-0.334279	-0.11615	-0.410027	-0.206177	0.364245	-0.340728	0.153948	-0.313114	-0.223047	-0.177187	0.701228	-0.156272	2.43117	0.52584
P2	2	-0.652041	-0.909021	-0.634238	-0.529209	-0.506456	-1.15012	-0.635673	-0.542875	-0.794242	-0.353654	-0.42074	-0.451078	-0.943364	-0.800124	-0.786447	-0.661908	-0.510878	-0.70944
P8	2	-0.0523236	0.0311797	0.733607	0.0303974	-0.457352	-0.420331	-0.200714	0.132571	-0.305099	-0.0937673	-0.182828	-0.432494	-0.355308	-0.568126	0.132785	-0.254019	-0.116261	-0.72342
P9	2	2.47918	2.38393	3.7548	3.69683	3.23301	0.0127939	3.62716	0.533511	1.85681	-0.0905771	3.65196	0.146685	1.35914	2.32722	0.841669	3.57588	0.856854	0.126569
P4	2	-0.611684	-0.38018	-0.315	-0.529209	-0.506456	-1.15012	-0.635673	-0.542412	-0.794242	-0.353654	-0.42074	-0.451078	-0.943364	-0.800124	-0.786447	-0.661908	-0.510878	0.300905
P16	2	0.221663	-0.314161	-0.629139	-0.529209	-0.506456	-1.15012	-0.635673	-0.542412	-0.794242	-0.353654	-0.42074	-0.451078	-0.943364	-0.800124	-0.786447	-0.661908	-0.510878	-0.72342
P19	2	-0.754622	-0.901453	-0.629139	-0.55262	-0.506456	-0.851487	0.487958	-0.363443	-0.713953	-0.19685	-0.351274	-0.292873	-0.685089	-0.885421	0.317698	-0.551234	-0.489472	-0.72342
P22	2	0.59892	0.278327	-0.629139	-0.529209	-0.506456	-1.15012	-0.635673	-0.542412	-0.794242	-0.353654	-0.42074	-0.451078	-0.943364	-0.800124	-0.786447	-0.661908	-0.510878	-0.72342
Table S2B	Eigen Values
Eigenanalysis of the Correlation Matrix
Eigenvalue	7.8899	2.8844	2.1774	1.6184	1.0438	0.8999	0.4063	0.3366	0.29	0.1578
Proportion	0.438	0.16	0.121	0.09	0.058	0.05	0.023	0.019	0.016	0.009
Cumulative	0.438	0.599	0.72	0.809	0.867	0.917	0.94	0.959	0.975	0.984
Eigenvalue	0.1379	0.0646	0.0453	0.0237	0.0143	0.0059	0.0028	0.0012
Proportion	0.008	0.004	0.003	0.001	0.001	0	0	0
Cumulative	0.991	0.995	0.997	0.999	0.999	1	1	1
Table S2C	Eigen Vectors
Table S1C	Eigen Vectors
Variable	PC1	PC2
Naphthalene	0.205	-0.109
1-Methyl Naphthalene	0.261	-0.228
2-Methyl Naphthalene	0.263	0.228
Acenaphthylene	0.293	0.273
1,6 Dimethyl Naphthalene	0.254	0.289
Fluorene	0.191	-0.256
1,6,7 Trimethylnaphthalene	0.274	0.315
Anthracene	0.177	-0.314
Dibenzothiopene	0.286	-0.064
2-Methyl Anthracene	0.01	0.171
1-Methylphenanthrene	0.29	-0.087
2-Methylphenanthrene	0.043	-0.217
Pyrene	0.29	-0.225
Fluoranthene	0.311	-0.193
1-Phenyl Naphthalene	0.195	0.343
2-Phenyl Naphthalene	0.32	-0.079
1 Methylpyrene	0.134	-0.207
Benzo(c)phenanthrene	0.141	0.347
Table S2D	\
	S1	S2
P1	-0.79265	0.897886
P2	-1.27965	-1.98186
P3	2.32548	2.21287
P4	1.06431	0.913906
P5	2.39696	0.355729
P6	3.70606	2.33303
P7	-0.852726	-1.26245
P8	-0.0880647	1.65404
P9	-2.02754	0.953545
P10	3.83426	-5.03646
P11	-0.724132	-1.6059
P12	-2.34943	-0.163984
P13	1.80467	-3.85141
P14	-2.53757	0.2863
P15	-1.08606	0.824566
P16	-0.687314	0.553659
P17	0.126717	-0.100927
P18	-2.75177	0.249464
P19	-0.600692	0.20077
P20	9.49237	1.42782
P21	-2.36139	0.559733
P22	-2.41686	0.00303264
P23	-2.01085	0.758424
P24	-2.18412	-0.181783

## Sheet: Figure S1 Structures of PAHs
Figure S1: 27 PAHs included in this study which are divided in 2 categories of EPA priority compounds (known toxicity) and non-priority compounds. PAHs are further sorted by number of rings (2,3,4 and 5 rings).

## Sheet: Figure S2 -Scree Plot
Principle Component	Eigenvalue
1	7.8899
2	2.8844
3	2.1774
4	1.6184
5	1.0438
6	0.8999
7	0.4063
8	0.3366
9	0.29
10	0.1578
11	0.1379
12	0.0646
13	0.0453
14	0.0237
15	0.0143
16	0.0059
17	0.0028
18	0.0012		Figure S1: A scree plot showing the Eigenvalue of each principle component generated in the principle component analysis. Also shown is the percent variance described by the first two principle components. The remainder can be seen in TableS2B

## Sheet: Table S3 PAH Detections in WB
PAH (ng/g)	P1	P2	P3	P4	P5	P6	P7	P8	P9	P10	P11	P12	P13	P14	P15	P16	P17	P18	P19	P20	P21	P22	P23	P24
Naphthalene	0.899283	5.52534	3.62572	3.39211	3.57719	4.49071	1.59571	0.835033	0.372508	0.229449	<LOD	<LOD	17.0343	1.82948	<LOD	2.49715	2.13894	0.495539	3.0619	13.8949	0.668238	4.23437	<LOD	5.84876
1-Methyl Naphthalene	4.96809	4.6628	4.69407	3.53863	4.74754	5.11474	3.1962	2.1073	0.574133	9.24795	1.56576	<LOD	17.2936	0.921248	0.938926	5.46846	3.00163	0.330959	4.37959	14.5109	2.60822	2.89251	0.363549	5.44384
2-Methyl Naphthalene	2.1508	<LOD	3.93158	1.69549	2.93614	3.9976	<LOD	1.71536	0.46062	<LOD	<LOD	<LOD	<LOD	0.991868	<LOD	2.78666	2.08198	0.0176814	3.32206	10.6205	0.788883	<LOD	<LOD	<LOD
Acenaphthylene	0.0130812	<LOD	3.01515	1.38585	3.39426	6.65928	<LOD	1.64841	2.30227	<LOD	<LOD	<LOD	<LOD	<LOD	0.619087	1.146	0.790751	<LOD	1.64073	11.2111	<LOD	<LOD	0.118891	<LOD
Acenaphthene	<LOD	<LOD	1.78415	<LOD	<LOD	3.44118	<LOD	0.256667	<LOD	<LOD	<LOD	<LOD	<LOD	<LOD	<LOD	<LOD	0.679399	1.45177	0.013405	7.05909	<LOD	<LOD	<LOD	<LOD
1,2 Dimethyl Naphthalene	<LOD	<LOD	<LOD	1.23893	2.64274	2.14415	<LOD	0.362315	1.11197	<LOD	<LOD	<LOD	<LOD	<LOD	<LOD	<LOD	1.71161	<LOD	3.5289	9.73662	<LOD	<LOD	<LOD	<LOD
1,6 Dimethyl Naphthalene	0.700347	<LOD	2.63824	1.38071	1.10061	2.25755	<LOD	1.7568	2.07096	<LOD	<LOD	<LOD	<LOD	<LOD	0.653186	0.602474	0.943942	<LOD	0.8482	3.71905	<LOD	<LOD	<LOD	<LOD
Fluorene	2.24814	7.46819	7.34903	7.15674	8.4422	9.23632	8.22057	13.5856	<LOD	14.9815	12.5496	3.6681	11.9642	<LOD	3.40436	3.97759	5.11225	<LOD	3.69654	5.71237	<LOD	<LOD	1.68987	<LOD
1,6,7 Trimethylnaphthalene	5.10236	<LOD	6.79127	6.51709	4.68032	6.46495	<LOD	4.74877	<LOD	<LOD	<LOD	<LOD	<LOD	<LOD	2.94272	2.83531	1.13276	<LOD	1.94234	16.7479	<LOD	<LOD	4.606	<LOD
Anthracene	10.1656	22.1212	9.64186	22.3997	26.3787	20.9594	12.4284	4.17309	<LOD	148.584	9.90358	9.85581	<LOD	<LOD	13.2252	11.6963	10.3206	0.0959541	20.6076	32.7832	<LOD	<LOD	5.54486	<LOD
Phenanthrene	<LOD	<LOD	3.97984	67.4287	0.50824	2.99942	1.62525	<LOD	<LOD	6.73647	52.6953	55.8216	<LOD	<LOD	<LOD	<LOD	1.25184	<LOD	<LOD	<LOD	<LOD	<LOD	<LOD	<LOD
Dibenzothiopene	1.16328	<LOD	4.11602	4.22561	3.98849	3.25597	2.57877	1.80988	<LOD	8.5016	0.803986	<LOD	<LOD	<LOD	2.19278	0.892575	2.70966	<LOD	1.17876	6.12342	<LOD	<LOD	0.243636	<LOD
2-Methyl Anthracene	0.540862	<LOD	4.51898	8.40139	13.0101	4.49003	<LOD	135.667	<LOD	<LOD	<LOD	<LOD	<LOD	<LOD	54.4327	0.334745	0.512078	<LOD	7.81152	7.90581	<LOD	<LOD	4.76468	<LOD
1-Methylphenanthrene	14.9581	<LOD	12.0937	19.4927	11.2138	2.03359	2.42908	0.312734	<LOD	94.2011	<LOD	<LOD	<LOD	<LOD	9.58501	3.23182	18.8013	<LOD	7.85965	132.45	<LOD	<LOD	2.38692	<LOD
2-Methylphenanthrene	5.4785	217.398	18.2456	36.4282	16.4553	10.804	18.637	16.201	<LOD	70.9987	16.5757	<LOD	<LOD	<LOD	14.0411	1.4664	6.66919	<LOD	1.20122	27.7294	<LOD	<LOD	7.59627	<LOD
Pyrene	4.84983	7.6761	14.9369	10.1099	26.0579	20.8687	11.7125	3.45346	<LOD	28.3798	15.21	3.9052	24.2868	<LOD	3.27236	7.77024	7.87037	<LOD	6.69332	21.9508	<LOD	<LOD	3.75848	<LOD
Fluoranthene	4.47976	<LOD	9.71886	9.80366	19.0489	20.0866	10.2724	4.8683	<LOD	24.229	16.3193	5.42523	27.6663	<LOD	7.61561	4.87206	8.20554	<LOD	4.78806	30.0984	<LOD	<LOD	2.01436	<LOD
1-Phenyl Naphthalene	2.87782	<LOD	6.24933	5.29977	7.95141	10.157	<LOD	3.03609	<LOD	<LOD	<LOD	<LOD	<LOD	<LOD	3.97401	2.19442	4.47058	<LOD	2.77383	4.88979	<LOD	<LOD	3.32578	<LOD
2-Phenyl Naphthalene	3.40918	5.33427	8.74116	3.69559	12.851	15.1037	10.7455	4.61432	<LOD	35.1164	10.6363	2.82642	3.41956	<LOD	7.08677	2.90762	6.27432	<LOD	5.07686	51.9952	<LOD	<LOD	1.43581	<LOD
3,6-Dimethylphenanthrene	<LOD	<LOD	2.56383	1.68975	2.01556	1.07948	4.92817	<LOD	<LOD	13.8538	<LOD	5.85254	4.10533	<LOD	<LOD	10.9756	<LOD	<LOD	<LOD	98.1883	<LOD	<LOD	<LOD	<LOD
1 Methylpyrene	4.57632	<LOD	7.51138	13.601	8.11251	19.2354	9.72998	4.22169	<LOD	10.5057	27.3625	<LOD	152.193	<LOD	6.49702	7.6778	111.572	<LOD	14.9912	51.8852	<LOD	<LOD	0.841577	<LOD
Benz(a)anthrancene	<LOD	<LOD	7.46278	<LOD	0.478729	5.32906	16.3728	<LOD	<LOD	25.2512	35.5153	<LOD	81.03	<LOD	<LOD	<LOD	5.54252	<LOD	<LOD	12.4382	<LOD	<LOD	<LOD	<LOD
Benzo(c)phenanthrene	3.6456	<LOD	7.03719	5.09596	3.38275	8.15711	<LOD	3.17374	<LOD	<LOD	<LOD	<LOD	<LOD	<LOD	2.60049	3.54365	3.06675	0.07387	<LOD	2.09938	2.52177	<LOD	<LOD	<LOD
Chrysene/Triphenylene	1.74222	<LOD	5.13889	3.16346	5.70811	6.74828	<LOD	2.92509	<LOD	<LOD	<LOD	<LOD	<LOD	<LOD	3.42698	4.2521	10.1138	<LOD	<LOD	3.04906	1.80006	<LOD	<LOD	<LOD
Benz(a)pyrene	<LOD	<LOD	2.84548	<LOD	5.07006	0.587278	<LOD	9.09144	<LOD	<LOD	<LOD	<LOD	<LOD	<LOD	0.774633	0.059435	5.91635	<LOD	<LOD	<LOD	3.77313	<LOD	0.199697	22.1247
Benz(e)pyrene	<LOD	<LOD	1.81632	0.298031	0.661718	2.36663	<LOD	2.66836	<LOD	<LOD	<LOD	<LOD	<LOD	<LOD	<LOD	0.139575	4.44041	<LOD	<LOD	<LOD	0.836095	<LOD	<LOD	9.68306
Table S2: Detection a<LOD quanitation of 27 PAH analytes in wristba<LODs a<LOD analyzed using GC-MS/MS. Values are presented here as ng PAH/g of wristba<LOD. Compou<LODs not detected are marked at <LOD.
Logan, can you add % detections to the parentheses for these 5 compounds?

## Sheet: Table S4 Urinary met. detection
Scola Exposome Study
Summary result of Urinary PAH Metabolites Analysis
Protocol: Acid hydrolysis / liquid-liquid extraction
				Concentration: ng/ml urine
			Numbers in red : metabolite level < LOQ but > LOD
			LOD	0.0983652	0.165908	0.281748	0.0852344	0.0517765	0.162337	0.182036	0.0754134	0.14091	0.388017	0.195893	0.0750625	0.267612	0.314745	0.305606	0.172635
			LOQ	0.348689	0.588116	0.998752	0.302142	0.18354	0.57546	0.645288	0.267329	0.499502	1.37546	0.694409	0.266085	0.948643	1.11572	1.08333	0.611964
			Creatinine	ng/ml urine	ng/ml urine	ng/ml urine	ng/ml urine	ng/ml urine	ng/ml urine	ng/ml urine	ng/ml urine	ng/ml urine	ng/ml urine	ng/ml urine	ng/ml urine	ng/ml urine	ng/ml urine	ng/ml urine	ng/ml urine
	Sample ID	Aliquot	conc. (mg/ml urine)	1-OH-NAP	2-OH-NAP	9-OH-FLU	3-OH-FLU	2-OH-FLU	4-OH-PHEN	9-OH-PHEN	3-OH-PHEN	1-OH-PHEN	2-OH-PHEN	1-OH-PYR	4-OH-CHRY	6-OH-CHRY	3-OH-CHRY	9-OH-BaA	3-OH-BaP
	P1_ES_849	D3-M2	0.719163	0.936	0.508	<LOD	<LOD	0.247	<LOD	<LOD	0.691	<LOD	0.703	<LOD	0.124	<LOD	<LOD	<LOD	<LOD
	P2_ES_875	D3-M2	0.535376	0.338	0.638	<LOD	0.186	0.115	<LOD	<LOD	0.385	<LOD	0.542	0.336	<LOD	<LOD	<LOD	<LOD	<LOD
	P3_ES_879	D3-M2	0.835622	0.219	0.825	<LOD	0.095	0.236	<LOD	<LOD	1.525	0.601	0.453	0.441	<LOD	<LOD	<LOD	<LOD	<LOD
	P4_ES_889	D3-M2	1.555	0.342	0.742	<LOD	<LOD	0.06	<LOD	<LOD	2.766	0.206	0.869	0.347	0.134	<LOD	<LOD	<LOD	<LOD
	P5_ES_874	D3-M2	0.841688	1.434	0.606	<LOD	0.122	0.188	<LOD	<LOD	0.443	<LOD	0.55	0.296	<LOD	<LOD	<LOD	<LOD	<LOD
	P6_ES_863	D3-M2	1.12434	0.568	0.783	<LOD	<LOD	0.206	<LOD	<LOD	1.346	0.205	0.572	<LOD	<LOD	<LOD	<LOD	<LOD	<LOD
	P7_ES_865	D3-M2	1.2129	0.308	0.564	<LOD	<LOD	0.171	<LOD	<LOD	0.75	<LOD	0.769	<LOD	0.093	<LOD	<LOD	<LOD	<LOD
	P8_ES_793	D3-M2	1.62111	0.463	0.607	<LOD	<LOD	0.144	<LOD	<LOD	1.123	<LOD	0.394	0.731	0.363	<LOD	<LOD	<LOD	<LOD
	P9_ES_866	D3-M2	0.235737	0.63	0.226	<LOD	<LOD	0.088	<LOD	<LOD	<LOD	<LOD	<LOD	<LOD	<LOD	<LOD	<LOD	<LOD	<LOD
	P10_ES_869	D3-M2	1.40882	0.572	0.556	<LOD	0.164	0.189	<LOD	<LOD	1.384	<LOD	0.395	<LOD	0.176	<LOD	<LOD	<LOD	<LOD
	P11_ES_905	D3-M2	0.861097	1.015	0.584	<LOD	0.187	0.058	<LOD	<LOD	0.839	<LOD	<LOD	<LOD	<LOD	<LOD	<LOD	<LOD	<LOD
	P12_ES_861	D3-M2	1.14921	0.556	0.188	<LOD	0.141	0.176	<LOD	<LOD	0.962	<LOD	0.417	0.389	0.155	<LOD	<LOD	<LOD	<LOD
	P13_ES_820	D3-M2	0.873229	0.466	0.216	0.284	<LOD	<LOD	<LOD	<LOD	0.574	0.253	<LOD	0.259	0.127	<LOD	<LOD	<LOD	<LOD
	P14_ES_796	D3-M2	0.648196	0.4	0.261	<LOD	0.139	0.2	<LOD	<LOD	0.281	<LOD	<LOD	<LOD	0.153	<LOD	<LOD	<LOD	<LOD
	P15_ES_914	D3-M2	1.52952	0.534	0.298	0.645	0.567	0.12	<LOD	<LOD	0.308	<LOD	<LOD	0.364	0.149	<LOD	<LOD	<LOD	<LOD
	P16_ES_912	D3-M2	1.28265	0.348	0.293	<LOD	<LOD	0.153	<LOD	<LOD	0.799	0.17	0.416	0.286	0.093	<LOD	<LOD	<LOD	<LOD
	P17_ES_903	D3-M2	0.492917	0.317	0.763	<LOD	0.108	0.125	<LOD	<LOD	0.474	<LOD	0.599	0.329	<LOD	<LOD	<LOD	<LOD	<LOD
	P18_ES_894	D3-M2	1.24929	0.548	0.905	<LOD	0.124	0.191	<LOD	<LOD	0.202	<LOD	0.778	0.288	0.125	<LOD	<LOD	<LOD	<LOD
	P19_ES_926	D3-M2	0.674278	0.85	0.223	<LOD	0.164	0.101	<LOD	<LOD	0.96	<LOD	0.598	<LOD	<LOD	<LOD	<LOD	<LOD	<LOD
	P20_ES_940	D3-M2	1.6387	2.653	0.613	<LOD	0.09	0.17	<LOD	<LOD	1.756	0.143	0.873	0.408	<LOD	<LOD	<LOD	<LOD	<LOD
	P21_ES_918	D3-M2	0.585114	0.205	0.352	<LOD	<LOD	<LOD	<LOD	<LOD	0.155	<LOD	0.659	<LOD	<LOD	<LOD	<LOD	<LOD	<LOD
	P22_ES_919	D3-M2	1.62353	0.379	0.734	<LOD	0.217	0.108	<LOD	<LOD	0.541	0.178	0.952	0.335	<LOD	<LOD	0.389	<LOD	<LOD
	P23_ES_900	D3-M2	0.720584	0.239	0.378	<LOD	<LOD	0.153	<LOD	<LOD	0.236	0.216	0.503	<LOD	0.212	<LOD	<LOD	<LOD	<LOD
	P24_ES_828	D3-M2	0.207711	0.268	<LOD	<LOD	0.117	<LOD	<LOD	<LOD	<LOD	<LOD	<LOD	<LOD	<LOD	<LOD	<LOD	<LOD	<LOD
		N = 24
		% detected		100	95.8333	8.33333	58.3333	87.5	0	0	91.6667	33.3333	75	54.1667	50	0	4.16667	0	0
			Concentration: ng/mg creatinine
			Creatinine	ng/mg creatinine	ng/mg creatinine	ng/mg creatinine	ng/mg creatinine	ng/mg creatinine	ng/mg creatinine	ng/mg creatinine	ng/mg creatinine	ng/mg creatinine	ng/mg creatinine	ng/mg creatinine	ng/mg creatinine	ng/mg creatinine	ng/mg creatinine	ng/mg creatinine	ng/mg creatinine
	Sample ID	Aliquot	conc. (mg/ml urine)	1-OH-NAP	2-OH-NAP	9-OH-FLU	3-OH-FLU	2-OH-FLU	4-OH-PHEN	9-OH-PHEN	3-OH-PHEN	1-OH-PHEN	2-OH-PHEN	1-OH-PYR	4-OH-CHRY	6-OH-CHRY	3-OH-CHRY	9-OH-BaA	3-OH-BaP
	P1_ES_849	D3-M2	0.719163	1.30151	0.706377	<LOD	<LOD	0.343455	<LOD	<LOD	0.960839	<LOD	0.977525	<LOD	0.172423	<LOD	<LOD	<LOD	<LOD
	P2_ES_875	D3-M2	0.535376	0.631331	1.19168	<LOD	0.347419	0.214802	<LOD	<LOD	0.71912	<LOD	1.01237	0.627596	<LOD	<LOD	<LOD	<LOD	<LOD
	P3_ES_879	D3-M2	0.835622	0.26208	0.987288	<LOD	0.113688	0.282424	<LOD	<LOD	1.82499	0.719225	0.542111	0.527751	<LOD	<LOD	<LOD	<LOD	<LOD
	P4_ES_889	D3-M2	1.555	0.219936	0.477171	<LOD	<LOD	0.0385852	<LOD	<LOD	1.77878	0.132476	0.558843	0.223151	0.0861737	<LOD	<LOD	<LOD	<LOD
	P5_ES_874	D3-M2	0.841688	1.70372	0.719982	<LOD	0.144947	0.223361	<LOD	<LOD	0.526324	<LOD	0.653449	0.351674	<LOD	<LOD	<LOD	<LOD	<LOD
	P6_ES_863	D3-M2	1.12434	0.505184	0.696407	<LOD	<LOD	0.183218	<LOD	<LOD	1.19714	0.182329	0.508741	<LOD	<LOD	<LOD	<LOD	<LOD	<LOD
	P7_ES_865	D3-M2	1.2129	0.253937	0.465001	<LOD	<LOD	0.140984	<LOD	<LOD	0.618352	<LOD	0.634017	<LOD	0.0766757	<LOD	<LOD	<LOD	<LOD
	P8_ES_793	D3-M2	1.62111	0.285606	0.374434	<LOD	<LOD	0.0888279	<LOD	<LOD	0.692734	<LOD	0.243043	0.450925	0.22392	<LOD	<LOD	<LOD	<LOD
	P9_ES_866	D3-M2	0.235737	2.67247	0.958694	<LOD	<LOD	0.373297	<LOD	<LOD	<LOD	<LOD	<LOD	<LOD	<LOD	<LOD	<LOD	<LOD	<LOD
	P10_ES_869	D3-M2	1.40882	0.406014	0.394657	<LOD	0.11641	0.134155	<LOD	<LOD	0.982384	<LOD	0.280377	<LOD	0.124927	<LOD	<LOD	<LOD	<LOD
	P11_ES_905	D3-M2	0.861097	1.17873	0.678204	<LOD	0.217165	0.0673559	<LOD	<LOD	0.974338	<LOD	<LOD	<LOD	<LOD	<LOD	<LOD	<LOD	<LOD
	P12_ES_861	D3-M2	1.14921	0.48381	0.16359	<LOD	0.122693	0.153148	<LOD	<LOD	0.837095	<LOD	0.362857	0.338493	0.134875	<LOD	<LOD	<LOD	<LOD
	P13_ES_820	D3-M2	0.873229	0.533652	0.247358	0.32523	<LOD	<LOD	<LOD	<LOD	0.657331	0.289729	<LOD	0.2966	0.145437	<LOD	<LOD	<LOD	<LOD
	P14_ES_796	D3-M2	0.648196	0.617097	0.402656	<LOD	0.214441	0.308549	<LOD	<LOD	0.433511	<LOD	<LOD	<LOD	0.23604	<LOD	<LOD	<LOD	<LOD
	P15_ES_914	D3-M2	1.52952	0.349128	0.194832	0.4217	0.370704	0.0784558	<LOD	<LOD	0.20137	<LOD	<LOD	0.237983	0.097416	<LOD	<LOD	<LOD	<LOD
	P16_ES_912	D3-M2	1.28265	0.271312	0.228433	<LOD	<LOD	0.119284	<LOD	<LOD	0.622927	0.132538	0.324327	0.222975	0.0725059	<LOD	<LOD	<LOD	<LOD
	P17_ES_903	D3-M2	0.492917	0.64311	1.54793	<LOD	0.219104	0.253592	<LOD	<LOD	0.961621	<LOD	1.21521	0.667455	<LOD	<LOD	<LOD	<LOD	<LOD
	P18_ES_894	D3-M2	1.24929	0.438648	0.724409	<LOD	0.0992561	0.152886	<LOD	<LOD	0.161691	<LOD	0.622752	0.23053	0.100057	<LOD	<LOD	<LOD	<LOD
	P19_ES_926	D3-M2	0.674278	1.26061	0.330724	<LOD	0.243223	0.14979	<LOD	<LOD	1.42375	<LOD	0.886875	<LOD	<LOD	<LOD	<LOD	<LOD	<LOD
	P20_ES_940	D3-M2	1.6387	1.61896	0.374076	<LOD	0.0549215	0.103741	<LOD	<LOD	1.07158	0.0872641	0.532738	0.248977	<LOD	<LOD	<LOD	<LOD	<LOD
	P21_ES_918	D3-M2	0.585114	0.350359	0.601592	<LOD	<LOD	<LOD	<LOD	<LOD	0.264906	<LOD	1.12628	<LOD	<LOD	<LOD	<LOD	<LOD	<LOD
	P22_ES_919	D3-M2	1.62353	0.233442	0.452101	<LOD	0.133659	0.0665217	<LOD	<LOD	0.333224	0.109638	0.586376	0.20634	<LOD	<LOD	0.239601	<LOD	<LOD
	P23_ES_900	D3-M2	0.720584	0.331675	0.524574	<LOD	<LOD	0.212328	<LOD	<LOD	0.327512	0.299757	0.698045	<LOD	0.294206	<LOD	<LOD	<LOD	<LOD
	P24_ES_828	D3-M2	0.207711	1.29025	<LOD	<LOD	0.563283	<LOD	<LOD	<LOD	<LOD	<LOD	<LOD	<LOD	<LOD	<LOD	<LOD	<LOD	<LOD
					f		f	f			f		f	f	f
	Table S3: Detection and quanitation of 16 PAH urinary metabolites in urine samples. Values are presented here as ng PAH/mL of urine and in a normalized form ng PAH/ mg of creatine. Compounds not detected are marked as <LOD.

## Sheet: Table S5 WB PAH RHO 
Rho (p-value)	Naphthalene	1-Methyl Naphthalene	2-Methyl Naphthalene	Acenaphthylene	1,6 Dimethyl Naphthalene	Fluorene	1,6,7 Trimethylnaphthalene	Anthracene	Dibenzothiopene	2-Methyl Anthracene	1-Methylphenanthrene	2-Methylphenanthrene	Pyrene	Fluoranthene	1-Phenyl Naphthalene	2-Phenyl Naphthalene	1 Methylpyrene	Benzo(c)phenanthrene
Naphthalene		0.879 (1.6E-8)	0.44 (2.8E-2)	0.47 (2.02E-2)	0.38 (6.0E0-2)	0.20 (3.3E-1)	0.38 (6E-2)	-0.06 (7.7E-1)	0.11 (6.0E-1)	-0.14 (5E-1)	0.34 (1E-1)	0.097 (6.5E-1)	0.48 (1.7 E-2)	0.61 (1.3E-3)	0.10 (6.3 E-1)	0.36 (7.7 E-2)	0.66 (3.9 E-4)	0.01 (9.6E-1)
1-Methyl Naphthalene			0.46 (2.2E-2)	0.43 (3.4E-2)	0.33 (1.1E-1)	0.42 (3.6E-2)	0.38 (6E-2)	0.33 (1.1E-1)	0.41 (4.6E-2)	-0.14 (5E-1)	0.57 (3.4E-3)	0.12 (5.7 E-1)	0.69 (1.4 E-4)	0.78 (6.2 E-6)	0.09 (6.5 E-1)	0.58 (2.8 E-3)	0.64 (6.5 E-4)	0.05 (8.2 E-1)
2-Methyl Naphthalene				0.87 (1.5E-8)	0.66 (4.4E-4)	0.03 (8.5E-1)	0.79 (3.4E-6)	0.08 (6.8E-1)	0.40 (5.1E-2)	0.04 (8.2E-1)	0.64 (6E-4)	-0.08 (7.1E-1)	0.35 (9.3E-2)	0.47 (1.8 E-2)	0.47 (1.8 E-2)	0.69 (1.8 E-4)	0.18 (3.8E-1)	0.28 (1.8 E-1)
Acenaphthylene					0.89 (5.6E-9)	0.14 (5E-1)	0.85 (8.0E-8)	0.10 (6.4E-1)	0.51 (1.1E-2)	0.05 (8E-1)	0.61 (1.3E-3)	-0.03 (8.8E-1)	0.46 (2.2E-2)	0.57 (3.2 E-3)	0.62 (1.1 E-3)	0.721 (7E-5)	0.12 (5.6 E-1)	0.45 (2.6 E-2)
1,6 Dimethyl Naphthalene						0.16 (4.5E-1)	0.79 (2.8E-6)	0.03 (8.7E-1)	0.47 (2.0E-2)	0.14 (4.9E-1)	0.53 (7.1E-3)	-0.017 (9.4E-1)	0.33 (1.1E-2)	0.43 (3.2 E-2)	0.51 (1.0 E-2)	0.59 (2.1 E-3)	0.077 (7.2 E-1)	0.46 (2.1 E-2)
Fluorene							0.12 (5.5E-1)	0.52 (9.0E-3)	0.55 (4.8E-3)	0.33 (1.1E-1)	0.27 (2E-1)	0.31 (1.4E-1)	0.74 (2.8E-5)	0.67 (3.4 E-4)	0.21 (3.2E-1)	0.45 (2.6 E-2)	0.34 (9.8 E-2)	0.19 (3.6 E-1)
1,6,7 Trimethylnaphthalene								0.07 (7.3E-1)	0.53 (6.5E-3)	0.18 (3.9E-1)	0.62 (1.1E-3)	-0.03 (8.8E-1)	0.36 (8.3E-2)	0.45 (2.5E-2)	0.67 (3.1 E-4)	0.64 (6.4 E-4)	0.060 (7.8E-1)	0.54 (6.2 E-3)
Anthracene									0.78 (5.7E-6)	-0.07 (7.2E-1)	0.66 (3.5E-4)	0.35 (9.2E-2)	0.60 (1.9E-3)	0.49 (1.4E-2)	0.035 (8.7 E-1)	0.65 (5.5 E-4)	-0.03 (8.6 E-1)	-0.032 (8.8 E-1)
Dibenzothiopene										0.065 (7.6E-1)	0.78 (5E-6)	0.15 (4.6 E-1)	0.72 (7.2 E-5)	0.66 (3.7E-4)	0.48 (1.7 E-2)	0.81 (1.2 E-6)	0.087 (6.8 E-1)	0.39 (5.8 E-2)
2-Methyl Anthracene											-0.06 (7.8E-1)	-0.034 (8.7E-1)	-0.14 (4.9 E-1)	-0.08 (7.0E-1)	0.17 (4.1 E-1)	-0.019 (9.3 E-1)	-0.10 (6.1 E-1)	0.18 (3.9 E-1)
1-Methylphenanthrene												0.15 (4.6E-1)	0.54 (6.4E-3)	0.64 (7.0 E-4)	0.1 (4.5 E-1)	0.9 (2.3 E-11)	0.16 (4.4 E-1)	0.02 (9.0 E-1)
2-Methylphenanthrene													0.17 (4.1E-1)	0.03 (8.6 E-1_	-0.09 (6.5E-1)	0.2 (3.5 E-1)	-0.11 (6.0 E-1)	-0.10 (6.4 E-1)
Pyrene														0.928 (5.9E-11)	0.41 (4.6 E-2)	0.7 (1.4 E-4)	0.437 (3.3 E-2_	0.25 (2.2 E-1)
Fluoranthene															0.33 (1.1 E-1)	0.7 (8.0 E-6)	0.56 (4.3 E-3)	0.18 (3.9 E-1)
1-Phenyl Naphthalene																0.28 *(1.7 E-1)	0.067 (7.5 E-1)	0.84 (2.6 E-7)
2-Phenyl Naphthalene																	0.17 (4.2 E-1)	0.11 (5.9 E-1)
1 Methylpyrene																		-0.001 (1)
Benzo(c)phenanthrene
	p-value < 0.05
	Bold - Rho > 0.7
Table S4: Correlation Coefficents for 27 PAH compounds detected in wristbands. Highlighted in yellow are species whose correlation coeffcient is considered statitically significant (p-value < 0.05) and bolded borders indicate the rho value is greater than 0.7

## Sheet: Table S6 Urinary Met RHO
Rho (p-value)	1OHHydroxy.Naphthalene	2OHHydroxy.Naphthalene	3OHHydroxy.Fluorene	2OHHydroxy.Fluorene	3OHHydroxy.Phenanthrene	1OHHydroxy.Phenanthrene	2OHHydroxy.Phenanthrene	1OHHydroxy.Pyrene	4OHHydroxy.Chrysene	Napthalene	Fluorene	Phenanthrene	Pyrene	Chrysene
1OHHydroxy.Naphthalene		0.17 (4.19E-1)	0.11 (5.8E-1)	0.4 (4.7E-2)	-0.17 (4.2E-1)	-0.256 (2.2E-1)	-0.04 (8.3E-1)	-0.17 (4.0E-1)	-0.27 (1.9E-1)	0.12 (5.2 E-1)	-0.16 (4.2E-1)	-0.11 (5.9E01)	0.12 (5.7E-1)	-0.07 (0.7E-1)
2OHHydroxy.Naphthalene			-0.05 (8.0E-1)	0.57 (3.4E-3)	0.17 (4.1E-1)	0.18 (3.9E-1)	0.6 (1.7E-3)	0.58 (2.5E-3)	-0.27 (1.9E-1)	-0.15 (4.6E-1)	0.012(9.5E-1)	-0.13 (5.4E-1)	0.013 (9.5E-1)	0.46 (2.6E-2)
3OHHydroxy.Fluorene				-0.14 (4.2E-1)	-0.24 (2.4E-1)	-0.17 (4.2E-1)	-0.047 (8.2E-1)	0.13 (5.2E-1)	-0.23 (2.7E-1)	-0.017 (9.3E-1)	-0.19 (3.7E-1)	-0.076 (7.2E-1)	-0.24 (2.5E-1)	-0.09 (6.4E-1)
2OHHydroxy.Fluorene					0.04 (8.5E-1)	0.19 (3.5E-1)	0.22 (2.9E-1)	0.17 (4.1E-1)	0.17 (4E-1)	-0.29 (1.6E-1)	-0.25 (2.3E-1)	-.27 (1.88E-1)	-0.1 (6.09E-1)	0.16 (4.2E-1)
3OHHydroxy.Phenanthrene						0.42 (4.1E-2)	0.16 (4.5E-1)	0.255 (2.2E-1)	-0.17 (4.1E-1)	0.14 (4.8E-1)	0.44 (2.8E-2)	0.42 (3.72E-2)	0.371 (7.3E-2)	0.35 (8.6E-2)
1OHHydroxy.Phenanthrene							-0.05 (8.0E-1)	0.28 (1.8E-1)	0.06 (7.7E-1)	0.17 (4.1E-1)	0.12 (5.7E-1)	-0.07 (7.36E-1)	0.18 (3.8E-1)	0.19 (3.6E-1)
2OHHydroxy.Phenanthrene								0.32 (1.2E-1)	-0.2 (3.3E-1)	-0.08 (6.8E-1)	-0.28 (1.8E-1)	-0.2 (3.48E-1)	-0.17 (4.0E-1)	0.29 (1.6E-1)
1OHHydroxy.Pyrene									-0.13 (5.1E-1)	0.14 (4.8E-1)	0.23 (2.6E-1)	-0.04 (8.17E-1)	0.01 (9.59E-1)	0.50 (1.8E-1)
4OHHydroxy.Chrysene										-0.17 (4.17E-1)	-0.006 (9.6E-1)	-0.05 (7.98E-1)	-0.24 (2.45E-1)	-0.27 (1.8E-1)
Napthalene											0.2 (3.2E-1)	-0.17 (4.1E-1)	0.49 (1.2E-2)	0.02 (9.1E-1)
Fluorene												0.21 (3.1E-1)	0.69 (1.8E-4)	0.14 (4.9E-1)
Phenanthrene													0.006 (9.7E-1)	-0.09 (6.5E-1)
Pyrene														0.221 (2.9E-1)
Chrysene
Table S6: Correlation Coefficents for 16 PAH urinary metabolites detected in urine. Highlighted in yellow are species whose correlation coeffcient is considered statitically significant (p-value < 0.05) and bolded borders indicate the rho value is greater than 0.7
	p-value < 0.05
	Bold - Rho > 0.7
